# Supplementary material
Source: PubMed Central journal article supplement (PMC7186205)
Supplement: mmc1.pdf [file mmc1.pdf]

## Supplemental Data

### Results

The details of the pairwise gene expression change comparison of the major genotypic HCM subgroups are summarized in **Supplemental Figure 1 and Supplemental Table 1A-C**. In brief, 1502 genes (4% of transcriptome) were expressed differentially comparing the 17 MYH7+ cases with the 23 MYBPC3+ cases; 2163 genes (6% of transcriptome) when comparing the 17 MYH7+ cases and the 48 genotype negative-HCM cases, and 2336 (6% of transcriptome) genes when comparing the 23 MYBPC3+ cases and the 48 genotype negative-HCM cases (**Supplemental Figure 1**). The up- and down-regulated genes for each of these subset analyses meeting an absolute and potentially biologically relevant fold-change  $> 1.5$  are summarized in **Supplemental Tables 1A-C**.

Compared to the comparison between HCM and normal hearts, much smaller fold changes of expression were observed in these intra-disease subset analyses. In the MYH7+ versus MYBPC3+ comparison, the maximum absolute fold change was 1.61 and only 2 transcripts (*APOA1* and *HS.131412*) exhibited an absolute fold change  $> 1.5$ . For the MYH7+ and genotype negative-HCM comparison, the maximum absolute fold change was 2.10 and only 13 transcripts exhibited an absolute fold change  $> 1.5$ . For the MYBPC3+ and genotype negative-HCM comparison, the maximum absolute fold change was 1.76 and only 6 transcripts (*CENPA*, *FGF12*, *HS.390250*, *HBA2*, *F3*, and *HBB*) exhibited a fold change  $> 1.5$  (**Supplemental Tables 1A-C**).

## Discussion

### *Genotype Subgroup Analysis*

Among our cases, 16% were caused by pathogenic/likely pathogenic variants in *MYH7* mutations, 22% of our HCM cases were caused by pathogenic/likely pathogenic variants in *MYBPC3*, and 45% of our HCM cases were unexplained genetically (genotype negative). Subset analyses showed those genes demonstrating an absolute difference in fold change  $> 1.5$ . The MYH7+ to MYBPC3+ comparison revealed only two genes. One was the major protein component of high density lipoprotein,<sup>29</sup> *APOA1* (1.51-fold in MYH7+), and one was an uncharacterized gene, *Hs.131412* (down 1.61-fold in MYH7+). While not directly associated with any known pro-hypertrophic pathway, *APOA1* protein could potentially have a heretofore undefined role in HCM; however, literature on a potential link is lacking. Given that 99.93% of genes in the MYH7+ versus MYBPC3+ comparison had a false discovery rate *q*-value  $> 0.9$ , it is more likely to conclude that these two genetic subtypes of HCM are nearly indistinguishable, at the time of surgical septal myectomy, at least at the transcriptome level.

Similar observations were made comparing MYH7+ to the genotype negative-HCM subset as well as the MYBPC3+ vs genotype negative-HCM subset suggesting that pathophysiological differences between subtypes are likely subtle. For example, for the MYH7 versus genotype negative subset, there were two genes with potential theoretical relationships to a myocardial disease process. The first of these genes was *CORIN*, encoding a protein that produces biologically active atrial natriuretic peptide<sup>35,36</sup>, which was down-regulated 1.74-fold in MYH7+. The second was *COL3A1*, encoding type III collagen<sup>37</sup>, up-regulated 1.53-fold in MYH7+, with possible relationship to the interstitial fibrosis observed in HCM. Other differentially expressed genes were related to glomerular injury<sup>30</sup> (*Thy1*), neurite outgrowth<sup>31</sup> (*SLITRK4*), lipoprotein catabolism<sup>29</sup> (*APOA1* and *APOE*), ketone body regulation<sup>32</sup> (*HMGCS2*), and hemoglobin<sup>33</sup> (*HBA2* and *HBB*).

### ***Potential Role of Down-Regulated Genes***

The most the down-regulated gene in our analysis was *SERPINA3* (down 11.8-fold in HCM compared to controls; validated by qRT-PCR). *SERPINA3* encodes a serine protease inhibitor that has been shown to have anti-inflammatory and anti-hypertrophic effects by blocking WNT signaling.<sup>31</sup> It normally functions to promote phosphorylation and degradation of beta-catenin, thus preventing the transcription of pro-inflammatory and pro-hypertrophic factors. The down-regulation of *SERPINA3A* in HCM suggests a subsequent upregulation of beta-catenin (up 1.1-fold in HCM compared to controls) and its associated pro-hypertrophic transcription factors, which could theoretically lead to pathological hypertrophy. Akin to *SERPINA3A*, we observed a down-regulation of *SERPINE1* (4.1-fold in HCM compared to controls; validated by qRT-PCR). The gene encodes the protein plasminogen activator inhibitor 1 (PAI-1), an inhibitor of fibrinolysis thought to protect against vascular permeability and fibrosis.<sup>32</sup> Down-regulation of this gene could promote vascular permeability, thus facilitating the infiltration of macrophages and other inflammatory mediators into the myocardial interstitial cells. This, in turn, could result in fibrosis, a hallmark microscopic feature of HCM, and a compensatory hypertrophic response. Other genes potentially worth further study were *RASL11B*, up-regulated 3.3-fold in HCM and thought to be related to RAS proteins which have established roles in hypertrophy,<sup>33</sup> and *SMOC2*, up-regulated 2.8-fold in HCM and thought to potentiate the effect of growth factors and to activate matrix metalloproteinases.<sup>34</sup>

**Supplemental Table 1: Differentially expressed genes in HCM, genotype subset comparisons**

**A. MYH7+ versus MYBPC3+**

| <b>Gene</b>      | <b>Official Full Name</b> | <b>Fold Change</b> | <b>Q-Value</b> | <b>P-Value</b>        | <b>GO Biological Process Term(s)</b> | <b>GO Molecular Function Term(s)</b> |
|------------------|---------------------------|--------------------|----------------|-----------------------|--------------------------------------|--------------------------------------|
| <i>APOA1</i>     | Apolipoprotein A-I        | +1.51              | 1.00           | 4.98x10 <sup>-2</sup> | Lipid metabolic process              | Cholesterol transport activity       |
| <i>HS.131412</i> | Not available             | -1.61              | 1.00           | 3.63x10 <sup>-2</sup> | Not available                        | Not available                        |

**Supplemental Table 1: Differentially expressed genes in HCM, genotype subset comparisons**

**B. MYH7+ versus Genotype-Negative HCM**

| <b>Gene</b>      | <b>Official Full Name</b>                 | <b>Fold Change</b> | <b>Q-Value</b> | <b>P-Value</b>         | <b>GO Biological Process Term(s)</b>                                                                    | <b>GO Molecular Function Term(s)</b>                              |
|------------------|-------------------------------------------|--------------------|----------------|------------------------|---------------------------------------------------------------------------------------------------------|-------------------------------------------------------------------|
| <i>THY1</i>      | Thy-1 cell surface antigen                | +1.68              | 0.39           | 1.47x10 <sup>-4</sup>  | Positive regulation of release of sequestered calcium ion into cytosol; angiogenesis                    | Enzyme binding; GPI anchor binding; Rho GTPase activator activity |
| <i>SLITRK4</i>   | SLIT and NTRK-like family, member 4       | +1.61              | 0.71           | 8.43x10 <sup>-3</sup>  | Axonogenesis                                                                                            | Not available                                                     |
| <i>HS.131412</i> | Not available                             | +1.59              | 0.81           | 2.20-x10 <sup>-2</sup> | Not available                                                                                           | Not available                                                     |
| <i>APOE</i>      | Apolipoprotein E                          | +1.53              | 0.58           | 2.13x10 <sup>-3</sup>  | Cholesterol homeostasis; cellular calcium ion homeostasis; response to growth factor stimulus           | Cholesterol transporter                                           |
| <i>COL3A1</i>    | Collagen, type III, alpha 1               | +1.53              | 0.51           | 8.02x10 <sup>-4</sup>  | Extracellular matrix structural constituent; transforming growth factor beta receptor signaling pathway | Extracellular matrix structural constituent; protein binding      |
| <i>HMGCS2</i>    | 3-Hydroxy-3-methylglutaryl-CoA synthase 2 | -2.10              | 0.63           | 4.10x10 <sup>-3</sup>  | Isoprenoid biosynthetic process                                                                         | Hydroxymethylglutaryl-CoA synthase activity                       |
| <i>HBA2</i>      | Hemoglobin, alpha 2                       | -1.92              | 0.46           | 3.75x10 <sup>-4</sup>  | Transport                                                                                               | Oxygen transporter activity                                       |
| <i>HS.390250</i> | Fibroblast growth factor 12               | -1.90              | 0.75           | 1.19x10 <sup>-2</sup>  | Signal transduction; heart development                                                                  | Growth factor activity                                            |

|                  |                                                     |       |      |                       |                                                                                                          |                                                 |
|------------------|-----------------------------------------------------|-------|------|-----------------------|----------------------------------------------------------------------------------------------------------|-------------------------------------------------|
| <i>HBB</i>       | Hemoglobin, beta                                    | -1.85 | 0.51 | $9.06 \times 10^{-4}$ | Oxygen transport                                                                                         | Oxygen transport activity                       |
| <i>CORIN</i>     | Corin, serine peptidase                             | -1.74 | 0.80 | $2.09 \times 10^{-2}$ | Regulation of systemic arterial blood pressure by atrial natriuretic peptide; peptide hormone processing | Peptidase activity; scavenger receptor activity |
| <i>FGF12</i>     | Fibroblast growth factor 12                         | -1.63 | 0.75 | $1.28 \times 10^{-2}$ | Signal transduction; heart development                                                                   | Growth factor activity                          |
| <i>LOC644322</i> | Similar to Ribosome biogenesis protein BMS1 homolog | -1.53 | 0.33 | $8.02 \times 10^{-5}$ | Not available                                                                                            | Not available                                   |
| <i>APOA1</i>     | Apolipoprotein A-I                                  | -1.51 | 0.83 | $2.62 \times 10^{-2}$ | Lipid metabolic process                                                                                  | Cholesterol transport activity                  |

---

**Supplemental Table 1: Differentially expressed genes in HCM, genotype subset comparisons****C. MYBPC3+ versus Genotype-Negative HCM**

| <b>Gene</b>      | <b>Official Full Name</b>                              | <b>Fold Change</b> | <b>Q-Value</b> | <b>P-Value</b>        | <b>Selected GO Biological Process Term(s)</b>                                                       | <b>GO Molecular Function Term(s)</b>                         |
|------------------|--------------------------------------------------------|--------------------|----------------|-----------------------|-----------------------------------------------------------------------------------------------------|--------------------------------------------------------------|
| <i>CENPA</i>     | Centromere protein A                                   | +1.76              | 0.65           | 2.93x10 <sup>-3</sup> | Nucleosome assembly                                                                                 | Chromatin binding; DNA binding; protein binding              |
| <i>FGF12</i>     | Fibroblast growth factor 12                            | -1.67              | 0.65           | 3.57x10 <sup>-3</sup> | Signal transduction; heart development                                                              | Growth factor activity                                       |
| <i>HS.390250</i> | Fibroblast growth factor 12                            | -1.67              | 0.73           | 2.45x10 <sup>-2</sup> | Signal transduction; heart development                                                              | Growth factor activity                                       |
| <i>HBA2</i>      | Hemoglobin, alpha 2                                    | -1.61              | 0.65           | 3.46x10 <sup>-3</sup> | Transport                                                                                           | Oxygen transporter activity                                  |
| <i>F3</i>        | Coagulation factor III (thromboplastin, tissue factor) | -1.53              | 0.34           | 8.53x10 <sup>-5</sup> | Blood coagulation; positive regulation of platelet-derived growth factor receptor signaling pathway | Cell surface binding; phospholipid binding; protease binding |
| <i>HBB</i>       | Hemoglobin, beta                                       | -1.50              | 0.70           | 1.33x10 <sup>-2</sup> | Oxygen transport                                                                                    | Oxygen transport activity                                    |

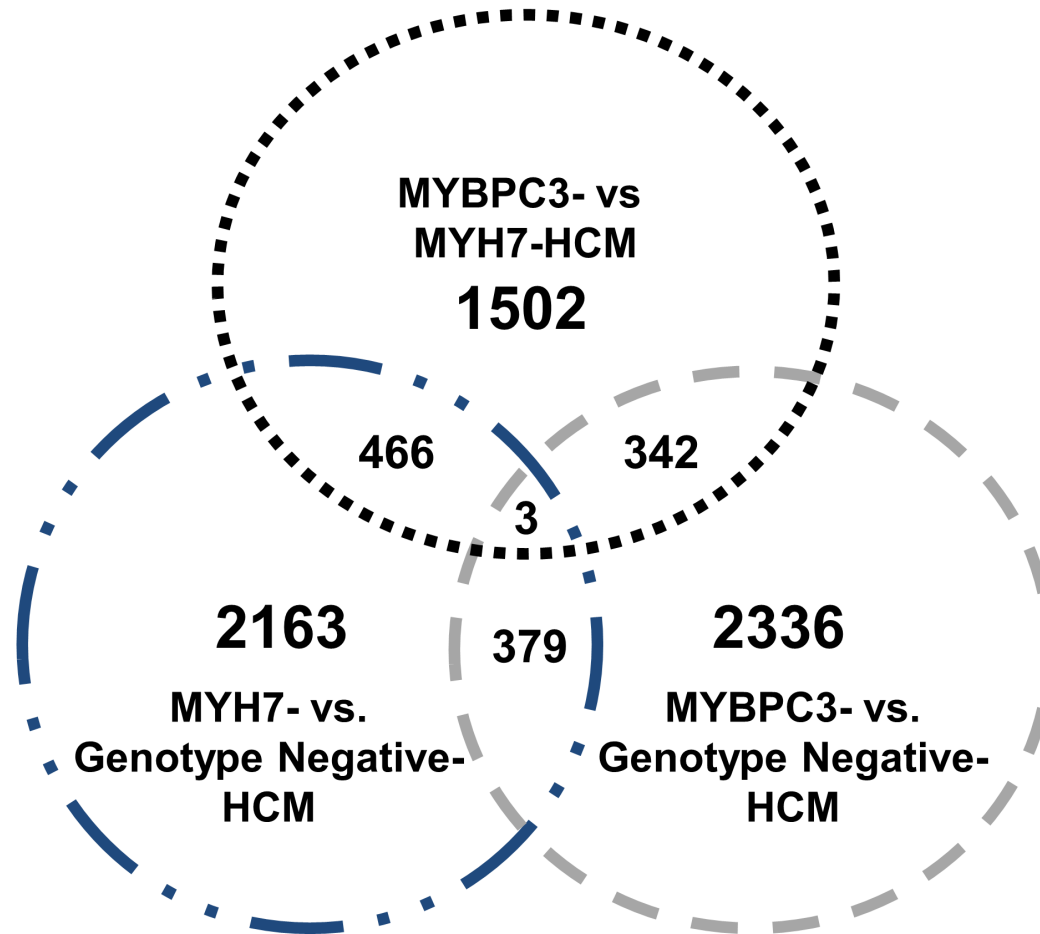

**Supplemental Figure 1.** Venn diagram depicting the number of genes that were expressed differentially among the major genetic subgroups of HCM: myosin binding protein C-HCM (MYBPC3-HCM), beta myosin heavy chain (MYH7-HCM), and Genotype Negative-HCM. The number of differentially expressed genes in the comparison between MYBPC3- and MYH7-HCM (1502 genes, or 4% of the transcriptome), MYBPC3- and Genotype Negative-HCM (2336 genes, or 6% of the transcriptome), and MYH7-HCM and Genotype Negative-HCM (2163 genes, or 6% of the transcriptome) are shown. Overlapping numbers of differentially expressed genes between each of the pairwise comparisons and among all three pairwise comparisons are also shown.
